# Supplementary material for: Evidence that a naturally occurring single nucleotide polymorphism in the RagC gene of Leishmania donovani contributes to reduced virulence
Source: PubMed Central journal article supplement (PMC7901767; doi:10.1371/journal.pntd.0009079), 2021-02-23
Supplement: pntd.0009079.s001.pdf [file pntd.0009079.s001.pdf]

**S1 Table. A table showing the percentages of metacyclic like promastigotes present in the stationary phase cultures of wild type *L. donovani*, R231C RagC mutant and the RagC null mutant.**

|                              | <b>Cell density in stationary phase</b>  | <b>Metacyclic cells from <math>2 \times 10^8</math> stationary cells</b> | <b>The metacyclic promastigotes rate (%)</b> |
|------------------------------|------------------------------------------|--------------------------------------------------------------------------|----------------------------------------------|
| <b>WT <i>L. donovani</i></b> | <b><math>7.925 \times 10^7</math>/ml</b> | <b><math>1.475 \times 10^6</math></b>                                    | <b>0.7375</b>                                |
| <b>R231C RagC</b>            | <b><math>6.325 \times 10^7</math>/ml</b> | <b><math>7.4 \times 10^6</math></b>                                      | <b>3.7</b>                                   |
| <b>RagC null mutant</b>      | <b><math>6.425 \times 10^7</math>/ml</b> | <b><math>6.71 \times 10^6</math></b>                                     | <b>3.355</b>                                 |
